# Supplementary material for: Hydrogen-bonded linear chain assemblies of palladium(ii)-selenoether complexes: solid state aggregates as templates for nano-structural Pd17Se15 leading to efficient electrocatalytic activity
Source: Royal Society of Chemistry journal article supplement (doi:10.1039/d3dt02170j), 2023-01-01
Supplement: d3dt02170j1.pdf [file d3dt02170j1.pdf]

**Table S11** Hydrogen bonding

MCl<sub>2</sub>L1(1)

| D-H      | d(D-H) | d(H··A) | ∠DHA   | d(D··A) | A                             |
|----------|--------|---------|--------|---------|-------------------------------|
| C3-H3    | 0.930  | 2.821   | 139.72 | 3.581   | C11 [ x+1/2, -y+3/2, z-1/2 ]  |
| C11-H11A | 0.960  | 2.840   | 127.49 | 3.508   | C11                           |
| C11-H11C | 0.960  | 2.769   | 158.71 | 3.680   | C12 [ -x+1, -y+1, -z+2 ]      |
| C12-H12A | 0.970  | 2.637   | 121.74 | 3.254   | N2                            |
| O2-H2    | 0.820  | 2.322   | 168.89 | 3.130   | C11 [ -x+3/2, y-1/2, -z+3/2 ] |

MCl<sub>2</sub>L2 (2)

| D-H      | d(D-H) | d(H··A) | ∠DHA   | d(D··A) | A                     |
|----------|--------|---------|--------|---------|-----------------------|
| C11-H11B | 0.960  | 2.591   | 147.81 | 3.441   | O2 [ -x+1, -y, -z+2 ] |
| C11-H11C | 0.960  | 2.911   | 143.81 | 3.729   | C12 [ -x, -y, -z+2 ]  |
| C12-H12A | 0.970  | 2.641   | 111.21 | 3.126   | N1                    |
| C12-H12B | 0.970  | 2.702   | 134.40 | 3.451   | C12 [ -x, -y, -z+2 ]  |
| C13-H13A | 0.970  | 2.907   | 148.47 | 3.768   | C12 [ x+1, y, z ]     |
| O2-H1O2  | 0.826  | 2.291   | 158.68 | 3.075   | C11 [ x+1, y-1, z ]   |

MCl<sub>2</sub>L3 (3)

| D-H      | d(D-H) | d(H··A) | ∠DHA   | d(D··A) | A                            |
|----------|--------|---------|--------|---------|------------------------------|
| O1-H1    | 0.820  | 2.359   | 165.79 | 3.160   | C11 [ x-1, y, z ]            |
| C3-H3    | 0.930  | 2.715   | 162.26 | 3.612   | C12 [ x+1/2, -y+3/2, z-1/2 ] |
| C12-H12B | 0.970  | 2.575   | 120.81 | 3.183   | N2                           |
| C12-H12B | 0.970  | 2.588   | 124.49 | 3.237   | N1                           |
| C10-H10A | 0.960  | 2.969   | 165.05 | 3.904   | C11 [ x-1/2, -y+3/2, z-1/2 ] |
| C10-H10C | 0.960  | 2.952   | 165.62 | 3.889   | C12 [ x+1/2, -y+3/2, z-1/2 ] |
| C11-H11A | 0.960  | 2.716   | 137.04 | 3.481   | C11                          |

(A)

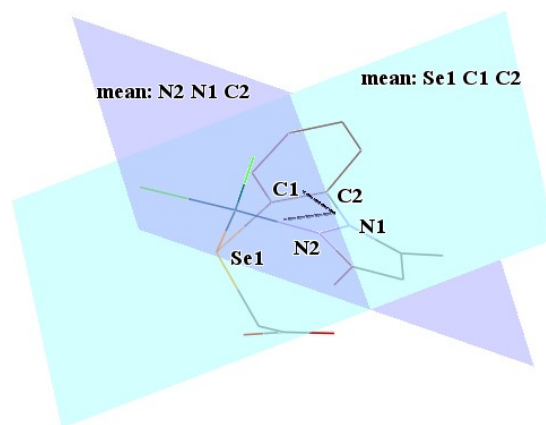

(B)

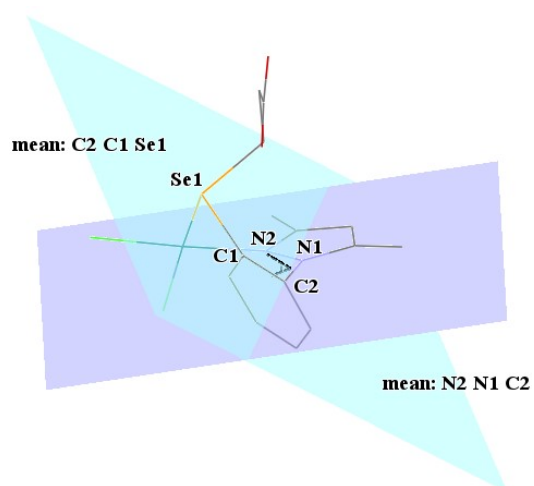

**Fig. S11.** (a) Mercury wireframe diagram showing angle formed by intersection of planes Se1C1C2 and N2N1C1 for (a) complex 1 and (b) complex 2.

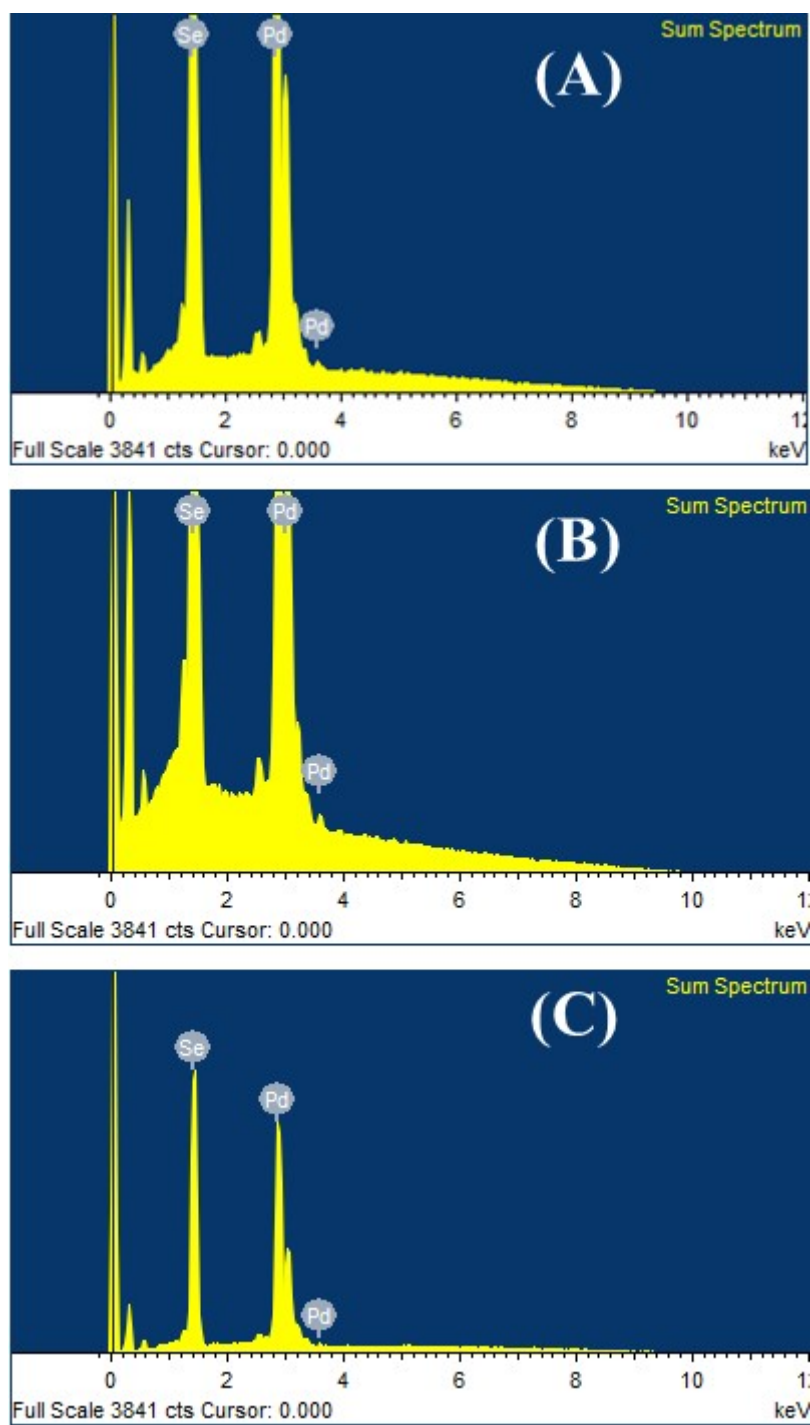

**Fig. S12** EDAX for MSNP obtained from (a) PdL1 (b) PdL2 (c) PdL3

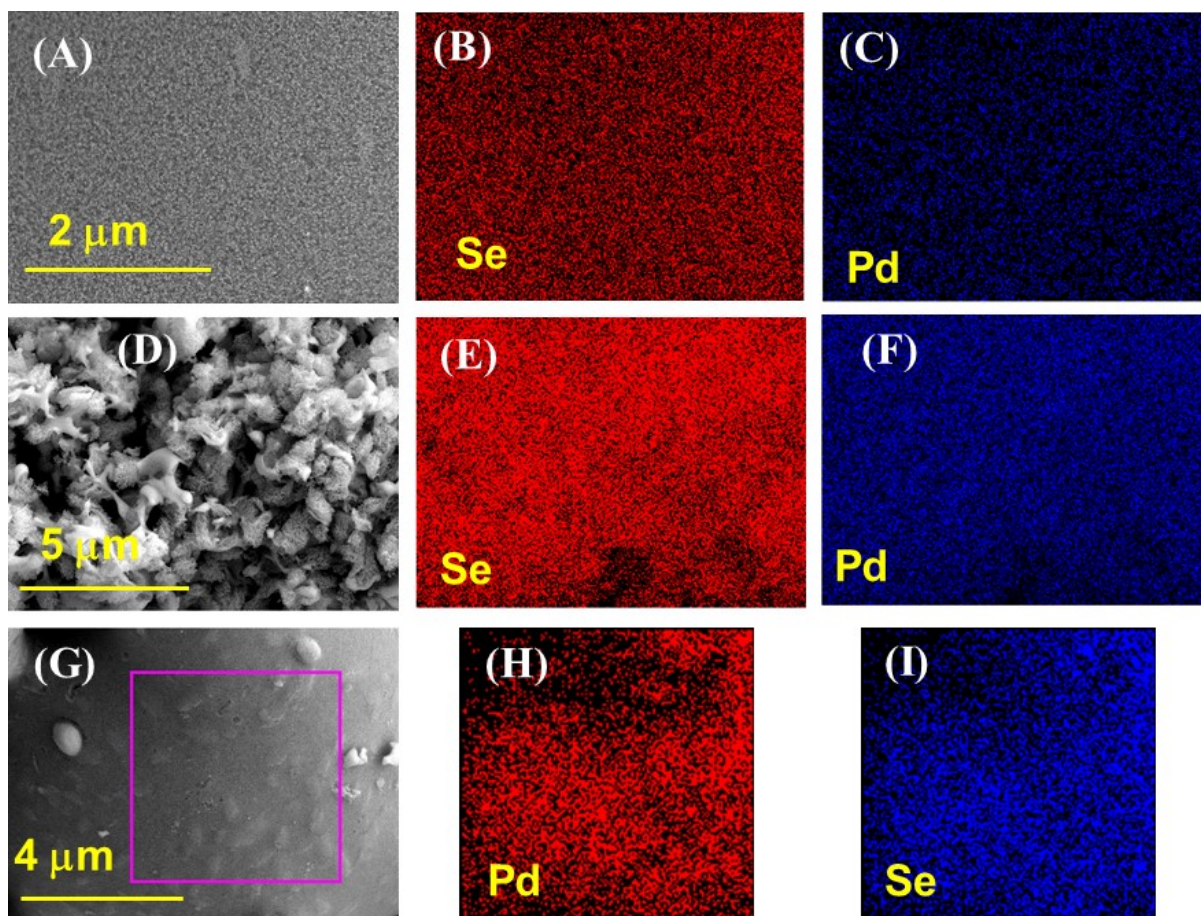

**Fig. S13** SEM images of (a) PSNP1, (b) PSNP2, (c) PSNP3; Elemental mapping of Selenium for (d) PSNP1, (e) PSNP2, (f) PSNP3 and palladium for (g) PSNP1, (h) PSNP2, (i) PSNP3

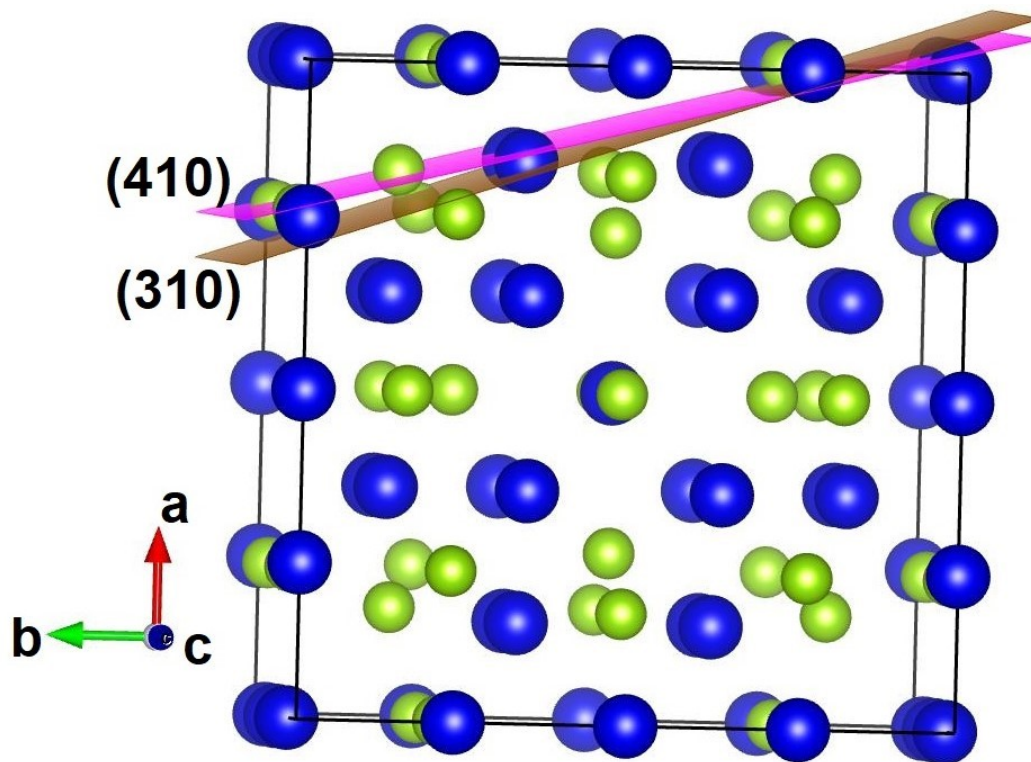

**Fig. S14.** Unit cell of Pd<sub>17</sub>Se<sub>15</sub> showing (310) and (413) planes

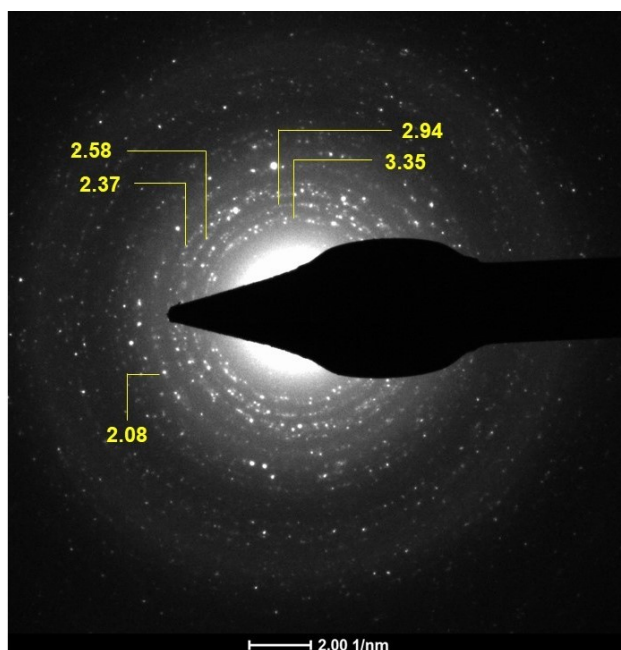

**Fig. SI5A.** SAED pattern of Pd<sub>17</sub>Se<sub>15</sub> obtained from PdL1

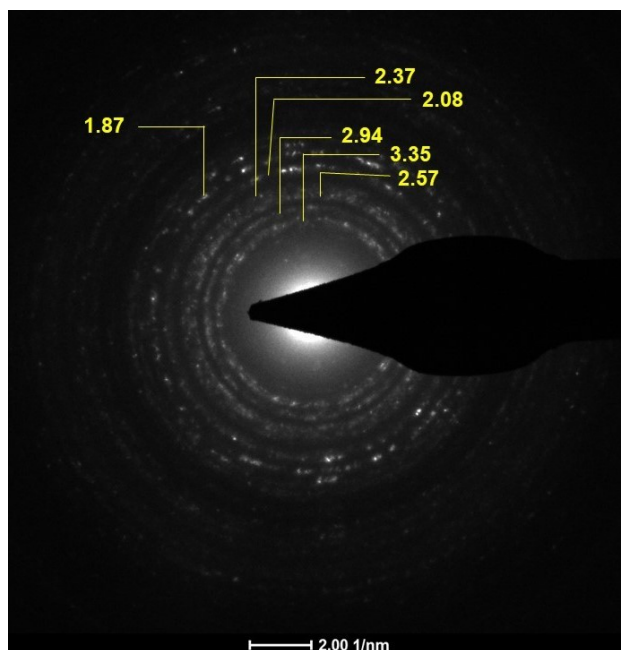

**Fig. SI5B.** SAED pattern of Pd<sub>17</sub>Se<sub>15</sub> obtained from PdL2

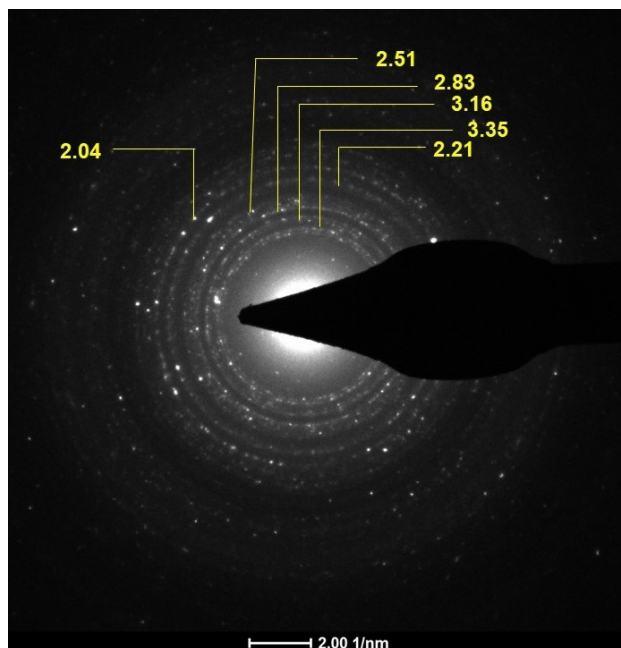

Fig. SI5C. SAED pattern of Pd<sub>17</sub>Se<sub>15</sub> obtained from PdL3

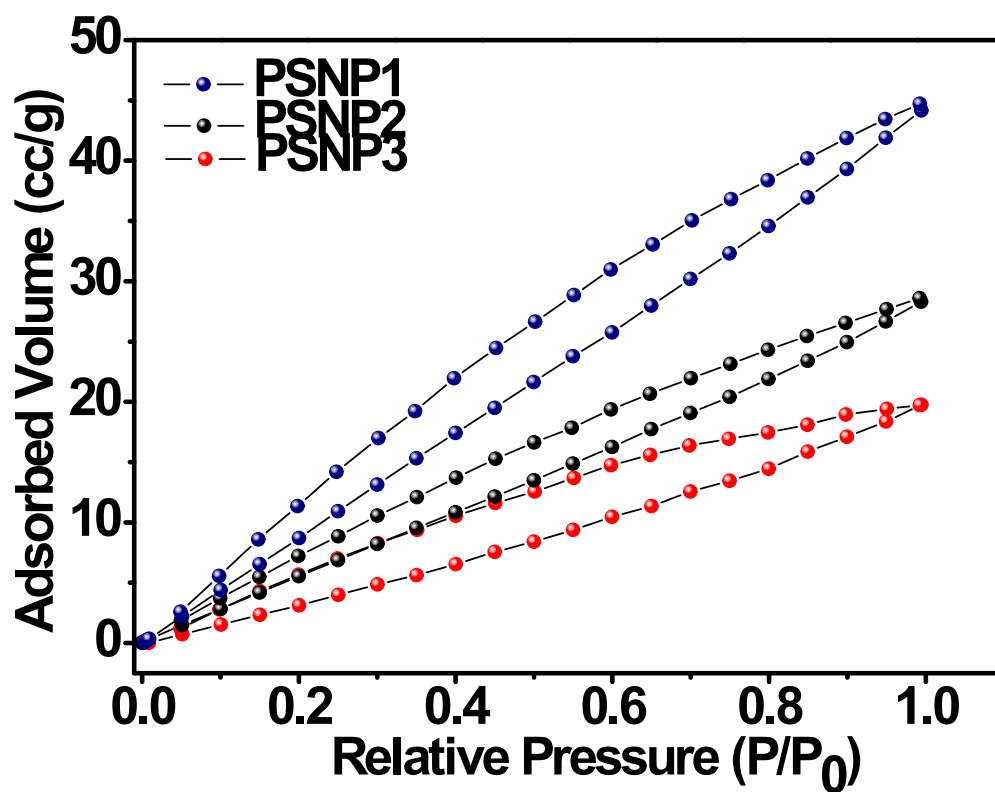

Fig. SI6A The N<sub>2</sub> adsorption-desorption isotherms

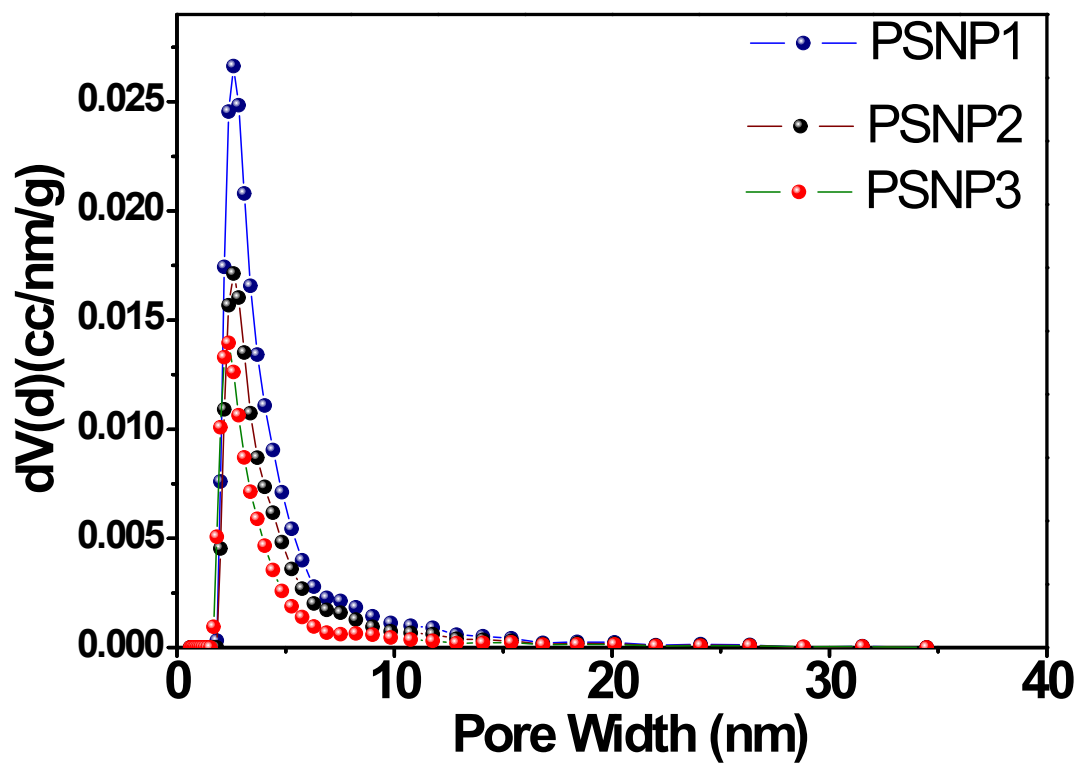

Fig. S16B The pore size distributions (PSDs)



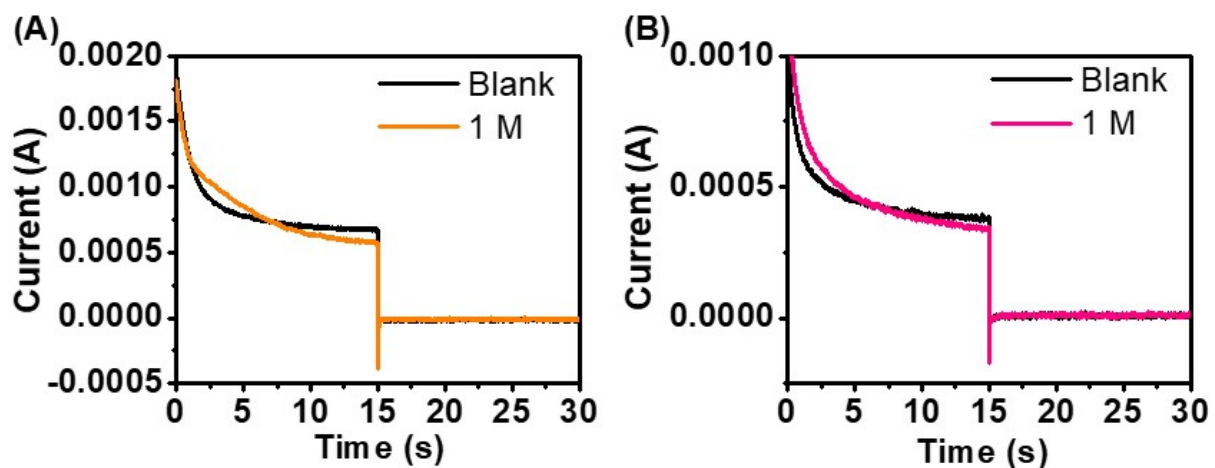

**Fig. S17** Chronoamperograms obtained at (A) PSNP2 modified electrode (B) PSNP3 modified electrode for 0 M and 1 M CH<sub>3</sub>OH in 0.5 M NaOH. First and second applied potential were 800 mV and 0 mV vs. Ag/AgCl (3 M KCl).
